# Supplementary material
Source: PubMed Central journal article supplement (PMC10375758)
Supplement: NIHMS1916305-supplement-1.pdf [file NIHMS1916305-supplement-1.pdf]

| Supplemental Digital Content 1: Codes to identify patients with lower extremity amputation    |           |           |
|-----------------------------------------------------------------------------------------------|-----------|-----------|
| Procedure codes lower extremity amputation                                                    |           |           |
| Description                                                                                   | Code type | Code      |
| Amputation of lower limb                                                                      | ICD9P     | 84.1      |
| Lower limb amputation, not otherwise specified                                                | ICD9P     | 84.1      |
| Amputation through foot                                                                       | ICD9P     | 84.12     |
| Disarticulation of ankle                                                                      | ICD9P     | 84.13     |
| Amputation of ankle through malleoli of tibia and fibula                                      | ICD9P     | 84.14     |
| Other amputation below knee                                                                   | ICD9P     | 84.15     |
| Disarticulation of knee                                                                       | ICD9P     | 84.16     |
| Amputation above knee                                                                         | ICD9P     | 84.17     |
| Disarticulation of hip                                                                        | ICD9P     | 84.18     |
| Abdominopelvic amputation                                                                     | ICD9P     | 84.19     |
| Hindquarter, Right                                                                            | ICD10P    | 0Y62      |
| Hindquarter, Left                                                                             | ICD10P    | 0Y63      |
| Hindquarter, Bilateral                                                                        | ICD10P    | 0Y64      |
| Femoral Region, Right                                                                         | ICD10P    | 0Y67      |
| Femoral Region, Left                                                                          | ICD10P    | 0Y68      |
| Upper Leg, Right                                                                              | ICD10P    | 0Y6C      |
| Upper Leg, Left                                                                               | ICD10P    | 0Y6D      |
| Knee Region, Right                                                                            | ICD10P    | 0Y6F      |
| Knee Region, Left                                                                             | ICD10P    | 0Y6G      |
| Lower Leg, Right                                                                              | ICD10P    | 0Y6H      |
| Lower Leg, Left                                                                               | ICD10P    | 0Y6J      |
| Foot, Right                                                                                   | ICD10P    | 0Y6M      |
| Foot, Left                                                                                    | ICD10P    | 0Y6N      |
| Amputation, thigh, through femur, any level                                                   | CPT       | 2759<br>0 |
| Amputation, thigh, through femur, any level; immediate fitting technique including first cast | CPT       | 2759<br>1 |
| Amputation, thigh, through femur, any level; open, circular (guillotine)                      | CPT       | 2759<br>2 |
| Amputation, thigh, through femur, any level; secondary closure or scar revision               | CPT       | 2759<br>4 |

|                                                                                                                                            |        |           |
|--------------------------------------------------------------------------------------------------------------------------------------------|--------|-----------|
| Disarticulation at knee                                                                                                                    | CPT    | 2759<br>8 |
| Amputation, leg, through tibia and fibula                                                                                                  | CPT    | 2788<br>0 |
| Amputation, leg, through tibia and fibula; with immediate fitting technique including application of first cast                            | CPT    | 2788<br>1 |
| Amputation, leg, through tibia and fibula; open, circular (guillotine)                                                                     | CPT    | 2788<br>2 |
| Amputation, leg, through tibia and fibula; re-amputation                                                                                   | CPT    | 2788<br>6 |
| Amputation, ankle, through malleoli of tibia and fibula (eg, Syme, Pirogoff type procedures), with plastic closure and resection of nerves | CPT    | 2788<br>8 |
| Ankle disarticulation                                                                                                                      | CPT    | 2788<br>9 |
| Amputation, foot; midtarsal (eg, Chopart type procedure)                                                                                   | CPT    | 2880<br>0 |
| Amputation, foot; transmetatarsal                                                                                                          | CPT    | 2880<br>5 |
| <b>Diagnosis codes traumatic amputation</b>                                                                                                |        |           |
| Traumatic amputation of leg(s) (complete) (partial), unilateral, below knee, without mention of complication                               | ICD9D  | 897.0     |
| Traumatic amputation of leg(s) (complete) (partial), unilateral, below knee, complicated                                                   | ICD9D  | 897.1     |
| Traumatic amputation of leg(s) (complete) (partial), unilateral, at or above knee, without mention of complication                         | ICD9D  | 897.2     |
| Traumatic amputation of leg(s) (complete) (partial), unilateral, at or above knee, complicated                                             | ICD9D  | 897.3     |
| Traumatic amputation of leg(s) (complete) (partial), unilateral, level not specified, without mention of complication                      | ICD9D  | 897.4     |
| Traumatic amputation of leg(s) (complete) (partial), unilateral, level not specified, complicated                                          | ICD9D  | 897.5     |
| Traumatic amputation of leg(s) (complete) (partial), bilateral [any level]], without mention of complication                               | ICD9D  | 897.6     |
| Traumatic amputation of leg(s) (complete) (partial), bilateral [any level], complicated                                                    | ICD9D  | 897.7     |
| Traumatic amputation at hip joint                                                                                                          | ICD10D | S78.0     |
| Traumatic amputation at level between hip and knee                                                                                         | ICD10D | S78.1     |
| Traumatic amputation of hip and thigh, level unspecified                                                                                   | ICD10D | S78.9     |
| Traumatic amputation of lower leg                                                                                                          | ICD10D | S88.0     |
| Traumatic amputation at level between knee and ankle                                                                                       | ICD10D | S88.1     |
| Traumatic amputation of lower leg, level unspecified                                                                                       | ICD10D | S88.9     |

CPT= Current Procedural Terminology, ICD=International Classification of Diseases, ICD9P= ICD 9th revision procedure code, ICD9D= ICD 9th revision diagnosis code, ICD10P= ICD 10th revision procedure code, ICD10D= ICD 10th revision diagnosis code

SDC 2

Supplemental Digital Content 2: Diagnosis and procedure codes used to flag patients with potential neuropathic stump pain

| <i>Name</i>                                                                                     | <i>Code type</i> | <i>Code</i> |
|-------------------------------------------------------------------------------------------------|------------------|-------------|
| Causalgia lower limb                                                                            | ICD9D            | 355.71      |
| Neuroma of amputation stump                                                                     | ICD9D            | 997.61      |
| Phantom limb (syndrome)                                                                         | ICD9D            | 353.6       |
| Other benign neoplasm of connective and other soft tissue of lower limb, including hip          | ICD9D            | 215.3       |
| Causalgia lower limb                                                                            | ICD10D           | G57.7       |
| Phantom limb syndrome without pain                                                              | ICD10D           | G54.7       |
| Phantom limb syndrome with pain                                                                 | ICD10D           | G54.6       |
| Neuroma of amputation stump, unspecified extremity                                              | ICD10D           | T87.30      |
| Neuroma of amputation stump, left lower extremity                                               | ICD10D           | T87.34      |
| Neuroma of amputation stump, right lower extremity                                              | ICD10D           | T87.33      |
| Lesion of sciatic nerve                                                                         | ICD10D           | G57.0       |
| Lesion of femoral nerve                                                                         | ICD10D           | G57.2       |
| Lesion of lateral popliteal nerve                                                               | ICD10D           | G57.3       |
| Lesion of medial popliteal nerve                                                                | ICD10D           | G57.4       |
| Benign neoplasm of peripheral nerves and autonomic nervous system of lower limb, including hip  | ICD10D           | D36.13      |
| Revision amputation                                                                             | ICD9P            | 84.3        |
| Other excision or avulsion of cranial and peripheral nerves                                     | ICD9P            | 4.07        |
| Excision of Sciatic Nerve, Open Approach                                                        | ICD10P           | 01BF0ZZ     |
| Excision of Tibial Nerve, Open Approach                                                         | ICD10P           | 01BG0ZZ     |
| Excision of Peroneal Nerve, Open Approach                                                       | ICD10P           | 01BH0ZZ     |
| Excision of neuroma; cutaneous nerve, surgically identifiable                                   | CPT              | 64774       |
| Excision of neuroma; major peripheral nerve, except sciatic                                     | CPT              | 64784       |
| Excision of neuroma; sciatic nerve                                                              | CPT              | 64786       |
| Implantation of nerve end into bone or muscle (List separately in addition to neuroma excision) | CPT              | 64787       |
| Amputation, thigh, through femur, any level; re-amputation                                      | CPT              | 27596       |
| Amputation, leg, through tibia and fibula; secondary closure or scar revision                   | CPT              | 27884       |
